# Supplementary material for: Single-cell RNA sequencing reveals midbrain dopamine neuron diversity emerging during mouse brain development
Source: PubMed Central journal article supplement (PMC6362095; doi:10.1038/s41467-019-08453-1), 2019-02-04
Supplement: 41467_2019_8453_MOESM3_ESM.pdf [file 41467_2019_8453_MOESM3_ESM.pdf]

## **Description of Additional Supplementary Files**

File Name: Supplementary Data 1

Description: Maturation gene list

File Name: Supplementary Data 2

Description: Subgroups gene list

File Name: Supplementary Data 3

Description: Padlock probe list

File Name: Supplementary Data 4

Description: Expression signal of padlock probes list
